# Supplementary material for: Promising Antifungal Molecules against Mucormycosis Agents Identified from Pandemic Response Box®: In Vitro and In Silico Analyses
Source: MDPI journal article supplement (doi:10.3390/jof9020187), 2023-01-31
Supplement: s1 [file s1]

**Table S1.** Pandemic Response Box<sup>®</sup> screening data. A total of 400 compounds were tested against *R. oryzae* UCP1295.

| Compounds code         | % of growth inhibition |       |       |       | Mean  | SD   |
|------------------------|------------------------|-------|-------|-------|-------|------|
| Control - Posaconazole | 54.1                   | 60.4  | 60.4  | 50.1  | 56.3  | 4.4  |
| MMV1634492             | -52.4                  | -15.3 | -28.2 | -26.3 | -30.6 | 13.5 |
| MMV1782108             | -10.5                  | -16.6 | -10.0 | -17.6 | -13.7 | 3.4  |
| MMV1634494             | -17.2                  | -13.7 | -12.9 | -15.5 | -14.8 | 1.6  |
| MMV1634386             | -13.9                  | -11.3 | -16.3 | -19.4 | -15.2 | 3.0  |
| MMV637528              | -31.5                  | -20.2 | -37.1 | -18.5 | -26.8 | 7.7  |
| MMV1782109             | -4.8                   | -13.9 | -13.7 | -23.5 | -14.0 | 6.6  |
| MMV1645051             | -44.0                  | -33.9 | -45.6 | -34.7 | -39.6 | 5.3  |
| MMV1634491             | -18.3                  | -12.8 | -15.5 | -13.7 | -15.1 | 2.1  |
| MMV002731              | -13.5                  | -12.4 | -13.5 | -12.6 | -13.0 | 0.5  |
| MMV000059              | -37.1                  | -37.1 | -41.9 | -38.1 | -38.5 | 2.0  |
| MMV637104              | -32.3                  | -31.5 | -29.0 | -29.0 | -30.4 | 1.4  |
| MMV637533              | -5.5                   | -4.3  | -8.4  | -2.4  | -5.2  | 2.2  |
| MMV1634362             | -30.6                  | -32.7 | -48.2 | -33.1 | -36.2 | 7.0  |
| MMV1634360             | -16.7                  | -19.0 | -18.0 | -18.6 | -18.1 | 0.9  |
| MMV002565              | -41.1                  | -37.1 | -37.1 | -42.7 | -39.5 | 2.5  |
| MMV396785              | 72.2                   | 70.2  | 68.5  | 69.5  | 70.1  | 1.3  |
| MMV003143              | -14.7                  | -13.5 | -13.9 | -14.4 | -14.1 | 0.5  |
| MMV002337              | -21.0                  | -45.2 | -41.9 | -37.9 | -36.5 | 9.3  |
| MMV1634363             | -16.5                  | -16.7 | -18.1 | -20.4 | -17.9 | 1.6  |
| MMV1634359             | -40.3                  | -44.4 | -50.0 | -35.2 | -42.5 | 5.4  |
| MMV1782110             | -5.0                   | -2.0  | -2.2  | -2.2  | -2.8  | 1.2  |
| MMV1634493             | -21.0                  | -37.9 | -27.4 | -36.3 | -30.7 | 6.9  |
| MMV344625              | -16.7                  | -12.6 | -12.2 | -11.5 | -13.3 | 2.0  |
| MMV1634358             | -10.4                  | -16.9 | -61.5 | -15.0 | -26.0 | 20.6 |
| MMV1578560             | -15.6                  | -12.8 | -14.9 | -14.9 | -14.6 | 1.0  |
| MMV640014              | -24.2                  | -17.9 | -16.9 | -12.1 | -17.8 | 4.3  |
| MMV004508              | -48.4                  | -36.3 | -22.6 | -22.6 | -32.5 | 10.8 |
| MMV1782212             | -2.6                   | -6.6  | -7.9  | -2.6  | -4.9  | 2.4  |
| MMV1782227             | -21.8                  | -29.0 | -16.9 | -28.2 | -24.0 | 5.0  |
| MMV1782226             | -19.2                  | -18.9 | -27.4 | -14.5 | -20.0 | 4.7  |
| MMV1782221             | -18.2                  | -13.6 | -13.0 | -13.1 | -14.5 | 2.2  |
| MMV1782224             | -13.3                  | -12.4 | -13.5 | -18.7 | -14.5 | 2.5  |
| MMV1782223             | -25.8                  | -36.0 | -16.9 | -26.6 | -26.3 | 6.7  |
| MMV1782218             | -14.5                  | -16.1 | -26.6 | -26.6 | -21.0 | 5.7  |
| MMV1782217             | -35.4                  | -21.5 | -32.2 | -27.4 | -29.1 | 5.2  |
| MMV1782216             | -25.0                  | -10.2 | -18.1 | -21.8 | -18.8 | 5.5  |
| MMV1009286             | -13.3                  | -13.5 | -13.3 | -11.5 | -12.9 | 0.8  |
| MMV1782225             | -17.7                  | -37.9 | -21.0 | -33.9 | -27.6 | 8.5  |
| MMV1782354             | -25.3                  | -50.1 | -51.5 | -25.8 | -38.2 | 12.6 |
| MMV689401              | -40.3                  | -21.0 | -33.1 | -51.6 | -36.5 | 11.1 |
| MMV1782351             | -14.2                  | -15.6 | -29.8 | -12.1 | -17.9 | 7.0  |
| MMV1782387             | -52.4                  | -27.4 | -24.2 | -18.5 | -30.6 | 13.0 |

|            |       |       |       |       |       |      |
|------------|-------|-------|-------|-------|-------|------|
| MMV1782389 | -18.1 | -16.9 | -18.7 | -29.0 | -20.7 | 4.9  |
| MMV1782388 | -27.7 | -34.0 | -26.5 | -21.9 | -27.5 | 4.3  |
| MMV1634557 | -15.2 | -14.1 | -14.7 | -19.4 | -15.9 | 2.1  |
| MMV030787  | -5.5  | -6.1  | -8.2  | -0.2  | -5.0  | 3.0  |
| MMV000028  | -4.5  | -4.3  | -5.8  | -3.3  | -4.5  | 0.9  |
| MMV002722  | -13.7 | -19.4 | -16.5 | -12.8 | -15.6 | 2.6  |
| MMV1593535 | -5.2  | -1.1  | -0.3  | -5.2  | -3.0  | 2.3  |
| MMV1593533 | -13.1 | -12.0 | -14.9 | -15.0 | -13.8 | 1.3  |
| MMV422940  | -11.3 | -11.9 | -11.1 | -12.4 | -11.7 | 0.5  |
| MMV1582497 | -18.4 | -17.4 | -18.2 | -14.4 | -17.1 | 1.6  |
| MMV1581553 | -24.2 | -11.8 | -17.7 | -29.0 | -20.7 | 6.5  |
| MMV1581548 | -12.7 | -18.4 | -19.2 | -13.1 | -15.8 | 3.0  |
| MMV1580850 | -22.6 | -22.6 | -20.2 | -38.7 | -26.0 | 7.4  |
| MMV002740  | -35.5 | -27.4 | -21.0 | -24.2 | -27.0 | 5.4  |
| MMV1579783 | -31.5 | -33.9 | -41.1 | -31.5 | -34.5 | 4.0  |
| MMV1578925 | -27.4 | -23.4 | -31.5 | -19.4 | -25.4 | 4.5  |
| MMV1578889 | -16.5 | -15.1 | -14.7 | -13.9 | -15.1 | 0.9  |
| MMV1578572 | -13.7 | -15.6 | -13.3 | -15.8 | -14.6 | 1.1  |
| MMV1578568 | -15.0 | -13.9 | -15.4 | -14.9 | -14.8 | 0.6  |
| MMV1580173 | 37.9  | 54.8  | 47.6  | 46.8  | 46.8  | 6.0  |
| MMV1634403 | -18.4 | -37.1 | -47.6 | -47.6 | -37.7 | 11.9 |
| MMV1634390 | -16.7 | -17.7 | -14.6 | -13.6 | -15.7 | 1.6  |
| MMV1633967 | -29.8 | -28.2 | -19.4 | -37.1 | -28.6 | 6.3  |
| MMV1593534 | -30.0 | -19.8 | -14.0 | -16.0 | -20.0 | 6.2  |
| MMV1582498 | -18.9 | -18.4 | -15.8 | -14.7 | -17.0 | 1.7  |
| MMV1582494 | -18.1 | -12.8 | -14.7 | -12.8 | -14.6 | 2.1  |
| MMV1582493 | -34.7 | -31.5 | -29.8 | -52.4 | -37.1 | 9.0  |
| MMV000043  | -41.9 | -36.3 | -33.9 | -34.7 | -36.7 | 3.1  |
| MMV003137  | -11.4 | -11.1 | -12.2 | -12.4 | -11.8 | 0.5  |
| MMV1581552 | -10.0 | -10.8 | -11.9 | -15.7 | -12.1 | 2.2  |
| MMV1581551 | -10.1 | -12.4 | -11.4 | -11.7 | -11.4 | 0.9  |
| MMV1580853 | -50.8 | -22.6 | -42.1 | -20.6 | -34.0 | 12.8 |
| MMV1580841 | -49.2 | -42.0 | -32.6 | -46.0 | -42.4 | 6.2  |
| MMV1579878 | -40.3 | -37.1 | -36.8 | -53.2 | -41.9 | 6.7  |
| MMV1579845 | -18.1 | -14.5 | -16.5 | -13.7 | -15.7 | 1.7  |
| MMV1579787 | -34.7 | -45.2 | -14.7 | -25.8 | -30.1 | 11.2 |
| MMV1579786 | -18.1 | -16.7 | -17.8 | -14.3 | -16.7 | 1.5  |
| MMV1579784 | -35.5 | -31.5 | -19.2 | -23.6 | -27.4 | 6.4  |
| MMV1483032 | -15.5 | -13.1 | -12.2 | -11.5 | -13.1 | 1.5  |
| MMV508427  | -12.8 | -6.9  | -2.3  | -17.7 | -9.9  | 5.8  |
| MMV1578565 | -14.7 | -12.3 | -16.2 | -14.6 | -14.4 | 1.4  |
| MMV1578561 | -29.2 | -33.8 | -12.3 | -22.3 | -24.4 | 8.1  |
| MMV1578557 | -5.4  | -8.5  | -5.4  | -3.1  | -5.6  | 1.9  |
| MMV000725  | -22.3 | -23.1 | -36.9 | -27.7 | -27.5 | 5.8  |
| MMV1634384 | -4.6  | -4.6  | -7.7  | -3.1  | -5.0  | 1.7  |
| MMV1634383 | -4.0  | -3.8  | -2.2  | -5.4  | -3.9  | 1.1  |
| MMV1613560 | -11.5 | -18.5 | -7.7  | -12.5 | -12.6 | 3.9  |
| MMV1230557 | -3.8  | -4.6  | -5.4  | -0.8  | -3.7  | 1.8  |

|            |       |       |       |       |       |      |
|------------|-------|-------|-------|-------|-------|------|
| MMV1593540 | -0.3  | -0.8  | -0.4  | -0.9  | -0.6  | 0.3  |
| MMV1593539 | -5.4  | -0.5  | -1.5  | -0.8  | -2.0  | 2.0  |
| MMV1582495 | -5.5  | -10.8 | -3.1  | -5.4  | -6.2  | 2.8  |
| MMV1582487 | -10.4 | -11.6 | -11.2 | -12.8 | -11.5 | 0.9  |
| MMV021759  | -4.6  | -3.1  | 0.0   | -5.4  | -3.3  | 2.1  |
| MMV1581555 | -8.5  | -6.9  | -5.4  | -6.8  | -6.9  | 1.1  |
| MMV1581547 | -4.6  | -1.5  | -2.3  | -3.8  | -3.1  | 1.2  |
| MMV687800  | -3.1  | 0.0   | -1.5  | -2.2  | -1.7  | 1.1  |
| MMV1580848 | -16.9 | -11.8 | -15.4 | -18.5 | -15.6 | 2.5  |
| MMV1580842 | 0.4   | 0.2   | 0.7   | 0.4   | 0.4   | 0.2  |
| MMV1580840 | -7.7  | -8.5  | -8.5  | -5.4  | -7.5  | 1.3  |
| MMV046261  | -8.5  | -6.9  | -8.5  | -11.1 | -8.7  | 1.5  |
| MMV1579846 | -10.0 | -11.0 | -13.0 | -12.2 | -11.6 | 1.1  |
| MMV1578842 | -0.2  | -0.4  | 0.0   | -0.9  | -0.4  | 0.3  |
| MMV1579776 | -34.6 | -24.6 | -22.3 | -15.4 | -24.2 | 6.9  |
| MMV1579775 | -7.7  | -4.6  | -7.7  | -8.5  | -7.1  | 1.5  |
| MMV1579354 | -33.1 | -34.6 | -26.9 | -30.8 | -31.3 | 2.9  |
| MMV1578899 | -4.6  | -2.5  | -2.2  | -1.2  | -2.6  | 1.2  |
| MMV1578890 | 0.2   | -0.5  | 1.2   | 1.5   | 0.6   | 0.8  |
| MMV1578886 | -11.0 | -10.5 | -10.7 | -13.1 | -11.3 | 1.0  |
| MMV1578573 | -3.8  | -9.2  | -1.5  | 0.0   | -3.7  | 3.5  |
| MMV1578571 | -8.5  | -6.2  | -7.0  | -7.2  | -7.2  | 0.8  |
| MMV687273  | -8.5  | -1.5  | 0.0   | -3.1  | -3.3  | 3.2  |
| MMV1634387 | -15.4 | -18.5 | -11.0 | -16.9 | -15.4 | 2.8  |
| MMV1633966 | -44.6 | -23.1 | -28.5 | -24.6 | -30.2 | 8.6  |
| MMV1505642 | -0.2  | -4.6  | -4.6  | -6.9  | -4.1  | 2.4  |
| MMV1593542 | -11.5 | -15.4 | -16.2 | -13.1 | -14.0 | 1.9  |
| MMV1593538 | -0.5  | 0.3   | 0.0   | 1.6   | 0.4   | 0.8  |
| MMV002560  | 0.0   | -10.2 | -13.8 | -1.6  | -6.4  | 5.8  |
| MMV002459  | -17.7 | -13.1 | -12.9 | -12.6 | -14.1 | 2.1  |
| MMV637945  | -23.1 | -32.3 | -31.5 | -23.1 | -27.5 | 4.4  |
| MMV1580854 | -25.1 | -37.7 | -41.5 | -42.3 | -36.7 | 6.9  |
| MMV1580851 | -21.5 | -8.3  | -16.5 | -8.5  | -13.7 | 5.6  |
| MMV1579849 | -41.5 | -30.8 | -16.9 | -13.8 | -25.8 | 11.1 |
| MMV1579844 | -3.8  | -5.4  | -1.2  | -2.6  | -3.3  | 1.5  |
| MMV141011  | -32.3 | -10.5 | -12.3 | -11.5 | -16.6 | 9.1  |
| MMV002516  | -18.5 | -13.5 | -14.6 | -17.7 | -16.1 | 2.1  |
| MMV688755  | 0.9   | 2.8   | 0.3   | 1.0   | 1.3   | 0.9  |
| MMV020752  | -5.4  | -9.0  | -10.3 | -10.8 | -8.9  | 2.1  |
| MMV1229204 | -6.2  | -14.6 | -13.1 | -11.1 | -11.2 | 3.2  |
| MMV1578575 | -15.4 | -31.5 | -11.7 | -26.9 | -21.4 | 8.1  |
| MMV1578556 | -6.9  | -6.2  | -3.8  | -2.4  | -4.8  | 1.8  |
| MMV1663457 | 0.0   | -5.6  | 2.6   | 1.3   | -0.4  | 3.1  |
| MMV1341773 | -25.4 | -30.8 | -36.2 | -20.8 | -28.3 | 5.8  |
| MMV1633970 | -14.6 | -10.8 | -10.8 | -12.8 | -12.3 | 1.6  |
| MMV1633965 | -7.7  | -11.8 | -13.8 | -13.2 | -11.6 | 2.4  |
| MMV093250  | -12.3 | -16.9 | -18.5 | -16.2 | -16.0 | 2.3  |
| MMV1593541 | -16.9 | -13.1 | -31.5 | -25.4 | -21.7 | 7.2  |

|            |       |       |       |       |       |      |
|------------|-------|-------|-------|-------|-------|------|
| MMV1593537 | -19.2 | -6.2  | -11.5 | -10.0 | -11.7 | 4.8  |
| MMV1582492 | -4.6  | -6.9  | -8.5  | -6.9  | -6.7  | 1.4  |
| MMV1582491 | -42.3 | -21.5 | -31.5 | -11.5 | -26.7 | 11.4 |
| MMV1582382 | -3.8  | -16.9 | -13.6 | -13.5 | -12.0 | 4.9  |
| MMV002354  | -21.5 | -26.9 | -23.1 | -18.5 | -22.5 | 3.0  |
| MMV1581557 | 0.8   | 5.4   | -1.9  | -3.1  | 0.3   | 3.3  |
| MMV1581554 | -43.5 | -25.4 | -28.5 | -20.8 | -29.5 | 8.5  |
| MMV1581550 | -41.5 | -21.5 | -39.2 | -16.2 | -29.6 | 11.0 |
| MMV1581546 | -7.7  | -6.2  | -8.5  | -1.5  | -6.0  | 2.7  |
| MMV1580844 | 62.3  | 80.8  | 69.2  | 68.5  | 70.2  | 6.7  |
| MMV1579788 | -33.8 | -24.6 | -30.0 | -26.9 | -28.8 | 3.5  |
| MMV1579785 | -18.5 | -14.6 | -20.0 | -20.0 | -18.3 | 2.2  |
| MMV811071  | -17.7 | -38.5 | -16.9 | -13.8 | -21.7 | 9.8  |
| MMV1578898 | 0.0   | 1.5   | 0.0   | -0.5  | 0.3   | 0.8  |
| MMV1549626 | -23.1 | -40.8 | -21.5 | -18.5 | -26.0 | 8.7  |
| MMV1578559 | -19.2 | -17.7 | -27.7 | -25.4 | -22.5 | 4.2  |
| MMV1578579 | 0.0   | -4.6  | -2.3  | -6.2  | -3.3  | 2.3  |
| MMV1578578 | -21.5 | -36.9 | -30.0 | -43.1 | -32.9 | 8.0  |
| MMV1578574 | -45.4 | -48.5 | -36.9 | -46.2 | -44.3 | 4.4  |
| MMV1578569 | -13.8 | -15.4 | -16.9 | -11.9 | -14.5 | 1.9  |
| MMV1578566 | -12.3 | -26.2 | -21.5 | -22.3 | -20.6 | 5.1  |
| MMV1578563 | -0.5  | -0.6  | -0.4  | -0.5  | -0.5  | 0.1  |
| MMV1578558 | -46.9 | -34.6 | -48.8 | -28.9 | -39.8 | 8.3  |
| MMV1782140 | -3.7  | -5.6  | -1.1  | -5.9  | -4.1  | 1.9  |
| MMV1634391 | -20.5 | -18.8 | -15.1 | -15.3 | -17.4 | 2.3  |
| MMV1633674 | -23.4 | -19.1 | -19.5 | -17.4 | -19.9 | 2.2  |
| MMV002169  | -9.2  | -6.2  | -3.8  | -2.6  | -5.4  | 2.5  |
| MMV002612  | -21.5 | -27.9 | -15.5 | -22.3 | -21.8 | 4.4  |
| MMV1613562 | -0.1  | -0.6  | -0.3  | -0.6  | -0.4  | 0.2  |
| MMV689758  | -23.2 | -29.1 | -11.3 | -16.2 | -19.9 | 6.8  |
| MMV1593532 | -14.7 | -14.1 | -14.5 | -15.7 | -14.7 | 0.6  |
| MMV002224  | -3.1  | -7.9  | -9.8  | -4.1  | -6.2  | 2.8  |
| MMV637659  | -22.6 | -18.6 | -19.3 | -16.1 | -19.1 | 2.3  |
| MMV1580846 | -27.6 | -27.6 | -37.4 | -41.5 | -33.5 | 6.1  |
| MMV1580845 | -26.0 | -26.0 | -57.7 | -40.7 | -37.6 | 13.1 |
| MMV1579850 | -5.7  | -8.1  | -1.4  | -4.5  | -4.9  | 2.4  |
| MMV374187  | -19.9 | -18.5 | -22.0 | -14.7 | -18.8 | 2.6  |
| MMV1579781 | -37.4 | -26.9 | -36.2 | -28.7 | -32.3 | 4.6  |
| MMV1579780 | -16.4 | -12.0 | -16.8 | -15.5 | -15.2 | 1.9  |
| MMV688756  | 0.5   | -11.1 | -8.5  | -13.9 | -8.2  | 5.4  |
| MMV1578897 | 0.9   | 5.8   | 1.3   | -12.9 | -1.2  | 7.0  |
| MMV001014  | -9.1  | -3.3  | -11.2 | -18.7 | -10.6 | 5.5  |
| MMV1578885 | -12.4 | -16.6 | -15.9 | -12.2 | -14.2 | 2.0  |
| MMV687696  | -30.2 | -43.9 | -20.4 | -39.0 | -33.4 | 8.9  |
| MMV011565  | -51.8 | -48.0 | -42.3 | -26.3 | -42.1 | 9.7  |
| MMV452821  | -17.0 | -16.9 | -14.0 | -16.3 | -16.1 | 1.2  |
| MMV1578576 | -16.7 | -43.9 | -47.7 | -50.4 | -39.7 | 13.5 |
| MMV1578562 | -17.2 | -14.7 | -16.3 | -29.3 | -19.4 | 5.8  |

|            |       |       |       |       |       |      |
|------------|-------|-------|-------|-------|-------|------|
| MMV1578555 | -5.0  | -39.8 | -15.6 | -14.1 | -18.6 | 12.9 |
| MMV1578554 | -15.4 | -14.8 | -15.5 | -12.3 | -14.5 | 1.3  |
| MMV1634402 | -1.5  | -9.3  | -3.4  | -5.2  | -4.8  | 2.9  |
| MMV1634399 | -15.0 | -16.9 | -17.8 | -15.5 | -16.3 | 1.1  |
| MMV000051  | -39.8 | -17.1 | -18.5 | -43.1 | -29.6 | 11.9 |
| MMV002287  | -58.5 | -21.4 | -32.5 | -24.0 | -34.1 | 14.7 |
| MMV831201  | -3.3  | -6.6  | -4.7  | -3.7  | -4.6  | 1.3  |
| MMV687801  | -12.3 | -12.5 | -14.3 | -13.7 | -13.2 | 0.8  |
| MMV1593531 | -56.1 | -23.6 | -24.1 | -13.0 | -29.2 | 16.2 |
| MMV1581558 | 51.2  | 41.5  | 60.2  | 60.2  | 53.3  | 7.7  |
| MMV1581556 | -47.2 | -28.9 | -41.5 | -53.7 | -42.8 | 9.1  |
| MMV1581549 | 20.3  | 21.1  | 17.1  | 16.3  | 18.7  | 2.1  |
| MMV1580847 | -17.7 | -17.5 | -16.2 | -15.8 | -16.8 | 0.8  |
| MMV1579847 | -7.2  | -9.6  | -5.3  | -6.7  | -7.2  | 1.5  |
| MMV1579782 | -0.4  | -0.8  | -5.0  | -1.9  | -2.1  | 1.8  |
| MMV1579777 | -4.8  | -6.5  | -6.9  | -7.2  | -6.3  | 0.9  |
| MMV292173  | -12.4 | -16.2 | -18.0 | -15.3 | -15.4 | 2.0  |
| MMV102270  | -55.6 | -13.2 | -41.4 | -22.8 | -33.2 | 16.4 |
| MMV000008  | -0.2  | -1.8  | -12.8 | 0.8   | -3.5  | 5.4  |
| MMV002260  | -20.7 | -14.7 | -8.9  | -17.9 | -15.5 | 4.4  |
| MMV102833  | 3.6   | 17.4  | -0.7  | -13.3 | 1.7   | 11.0 |
| MMV565773  | -30.9 | -19.5 | -43.9 | -26.0 | -30.1 | 8.9  |
| MMV1578577 | -1.8  | -1.6  | -11.2 | -4.8  | -4.8  | 3.9  |
| MMV233495  | 1.4   | 1.0   | -4.3  | 0.5   | -0.4  | 2.3  |
| MMV002676  | -20.1 | -13.4 | -17.6 | -14.2 | -16.3 | 2.7  |
| MMV1633675 | -24.4 | -30.9 | -27.3 | -19.3 | -25.5 | 4.2  |
| MMV303733  | -16.3 | -3.0  | -1.7  | -13.5 | -8.6  | 6.4  |
| MMV003249  | -5.2  | -5.0  | -4.7  | -5.7  | -5.2  | 0.4  |
| MMV001438  | -9.6  | -14.6 | -14.7 | -13.8 | -13.2 | 2.1  |
| MMV1582496 | -0.4  | 0.0   | -1.9  | -2.8  | -1.3  | 1.1  |
| MMV1582490 | -2.3  | -6.9  | -3.9  | 1.1   | -3.0  | 2.9  |
| MMV1582489 | -14.7 | -22.3 | -23.3 | -14.7 | -18.8 | 4.1  |
| MMV1582488 | -5.5  | -6.8  | -9.0  | -8.8  | -7.5  | 1.4  |
| MMV002665  | 2.0   | -9.6  | -1.6  | 0.3   | -2.2  | 4.4  |
| MMV1581559 | -19.9 | -17.7 | -19.1 | -18.7 | -18.9 | 0.8  |
| MMV1581545 | -55.6 | -42.3 | -31.5 | -37.9 | -41.8 | 8.8  |
| MMV1580855 | 0.2   | -2.0  | -1.2  | -0.7  | -1.0  | 0.8  |
| MMV1580852 | -13.4 | -10.4 | -15.1 | -12.6 | -12.9 | 1.7  |
| MMV1580849 | -15.3 | -21.5 | -20.9 | -21.8 | -19.9 | 2.6  |
| MMV1580839 | -9.3  | -2.3  | -0.2  | -0.5  | -3.1  | 3.7  |
| MMV1579779 | -35.8 | -31.8 | -35.7 | -29.9 | -33.3 | 2.5  |
| MMV1579778 | -14.8 | -11.1 | -12.0 | -16.1 | -13.5 | 2.0  |
| MMV099714  | -3.0  | -7.3  | -1.0  | 0.5   | -2.7  | 2.9  |
| MMV1578891 | -12.7 | -13.8 | -21.9 | -15.7 | -16.0 | 3.6  |
| MMV124656  | -56.5 | -40.3 | -22.0 | -32.5 | -37.8 | 12.6 |
| MMV975972  | 1.7   | -0.8  | 0.9   | -0.7  | 0.3   | 1.1  |
| MMV1578884 | -1.0  | -1.4  | -1.8  | -1.2  | -1.3  | 0.3  |
| MMV108465  | -20.3 | -41.3 | -35.8 | -31.9 | -32.3 | 7.7  |

|            |       |       |       |       |       |      |
|------------|-------|-------|-------|-------|-------|------|
| MMV1480967 | -19.9 | -20.5 | -21.5 | -19.6 | -20.4 | 0.7  |
| MMV1578570 | -17.2 | -22.8 | -25.8 | -25.0 | -22.7 | 3.4  |
| MMV1578564 | -17.6 | -16.2 | -19.0 | -16.7 | -17.4 | 1.1  |
| MMV1782215 | -5.8  | -8.5  | -5.0  | -5.2  | -6.1  | 1.4  |
| MMV1782403 | -44.7 | -43.1 | -41.5 | -41.5 | -42.7 | 1.3  |
| MMV1782402 | -25.9 | -10.6 | -23.5 | -19.1 | -19.8 | 5.9  |
| MMV1782411 | -1.6  | 3.3   | -15.4 | -17.1 | -7.7  | 8.7  |
| MMV214956  | -17.9 | 1.6   | -22.0 | -33.3 | -17.9 | 12.6 |
| MMV1634395 | -10.6 | -6.5  | -30.1 | -35.8 | -20.7 | 12.4 |
| MMV1634071 | -7.3  | -2.4  | -18.7 | -31.7 | -15.0 | 11.3 |
| MMV1633962 | -11.4 | 2.4   | -23.6 | -16.3 | -12.2 | 9.5  |
| MMV1633678 | -0.8  | 1.6   | -25.2 | -16.3 | -10.2 | 11.1 |
| MMV690480  | 4.9   | 8.1   | -8.9  | -11.4 | -1.8  | 8.5  |
| MMV1593517 | -26.0 | 2.4   | -4.1  | -6.5  | -8.5  | 10.6 |
| MMV1593515 | 21.1  | 34.1  | 20.3  | 30.9  | 26.6  | 6.0  |
| MMV1581032 | -4.9  | -8.1  | -4.9  | 3.3   | -3.7  | 4.2  |
| MMV1580799 | 3.3   | -8.1  | -2.4  | 0.8   | -1.6  | 4.3  |
| MMV001726  | -16.3 | -13.0 | -10.6 | -23.6 | -15.9 | 4.9  |
| MMV690653  | -13.0 | -12.2 | -3.3  | 1.6   | -6.7  | 6.1  |
| MMV1580484 | -26.8 | -10.6 | -2.4  | 8.9   | -7.7  | 13.0 |
| MMV1580478 | -35.0 | -19.5 | -15.4 | -8.1  | -19.5 | 9.8  |
| MMV1782102 | -13.0 | -26.0 | -4.1  | -1.6  | -11.2 | 9.6  |
| MMV394033  | -13.0 | -4.9  | 4.1   | 10.6  | -0.8  | 8.9  |
| MMV1634404 | -0.8  | 0.0   | 6.5   | 10.6  | 4.1   | 4.7  |
| MMV1634388 | -13.8 | -10.6 | -4.1  | 9.8   | -4.7  | 9.0  |
| MMV180402  | 4.9   | 4.1   | -1.6  | 4.9   | 3.0   | 2.7  |
| MMV642550  | 62.6  | 68.3  | 55.3  | 52.8  | 59.8  | 6.1  |
| MMV1580798 | 6.5   | 7.3   | -14.6 | -9.8  | -2.6  | 9.7  |
| MMV1580800 | -1.6  | 1.6   | -13.8 | -18.7 | -8.1  | 8.4  |
| MMV1580503 | -3.3  | 5.7   | -3.3  | -3.3  | -1.0  | 3.9  |
| MMV690547  | -4.9  | 9.8   | -12.2 | -7.3  | -3.7  | 8.2  |
| MMV1165877 | -2.4  | 5.7   | -3.3  | -9.8  | -2.4  | 5.5  |
| MMV1580497 | -17.1 | 5.7   | -18.7 | -4.1  | -8.5  | 10.0 |
| MMV1580495 | -12.2 | -0.8  | -13.8 | 3.3   | -5.9  | 7.3  |
| MMV1645152 | 11.4  | 0.8   | 3.3   | 3.3   | 4.7   | 4.0  |
| MMV1633677 | -5.7  | -3.3  | -17.9 | -13.0 | -10.0 | 5.8  |
| MMV1593520 | 5.7   | 4.1   | 0.0   | 8.1   | 4.5   | 3.0  |
| MMV1581029 | -7.3  | 4.1   | 8.9   | 0.8   | 1.6   | 5.9  |
| MMV1580794 | -4.9  | 10.6  | 1.6   | 0.0   | 1.8   | 5.6  |
| MMV001793  | -15.4 | -8.9  | -7.3  | -0.8  | -8.1  | 5.2  |
| MMV251679  | -9.8  | -5.7  | -3.3  | 0.0   | -4.7  | 3.6  |
| MMV003291  | -6.5  | 4.1   | 12.2  | 9.8   | 4.9   | 7.2  |
| MMV009948  | -12.2 | -8.1  | 3.3   | 4.9   | -3.0  | 7.3  |
| MMV1174026 | -19.5 | -14.6 | -13.0 | -4.1  | -12.8 | 5.6  |
| MMV003820  | -12.8 | -6.5  | -17.1 | -17.1 | -13.4 | 4.3  |
| MMV639951  | 3.3   | -3.3  | -12.2 | 2.4   | -2.4  | 6.2  |
| MMV1580491 | -10.6 | -17.1 | -24.1 | -22.5 | -18.6 | 5.3  |
| MMV1580492 | 4.1   | 0.8   | -13.8 | -20.3 | -7.3  | 10.1 |

|            |       |       |       |       |       |      |
|------------|-------|-------|-------|-------|-------|------|
| MMV690621  | 3.3   | -0.8  | -20.3 | -27.6 | -11.4 | 12.9 |
| MMV1782112 | -8.9  | -4.9  | -15.4 | -17.9 | -11.8 | 5.2  |
| MMV1782107 | 2.4   | 4.1   | -6.5  | -13.0 | -3.3  | 6.9  |
| MMV1782106 | 3.3   | 4.9   | -13.0 | -3.3  | -2.0  | 7.0  |
| MMV1782105 | -8.1  | -6.5  | -26.8 | -12.2 | -13.4 | 8.0  |
| MMV1782104 | -9.8  | 0.8   | -10.6 | 0.0   | -4.9  | 5.3  |
| MMV1782101 | 9.8   | 13.8  | 4.9   | 23.6  | 13.0  | 6.9  |
| MMV1633969 | -0.8  | -12.2 | -13.8 | -6.5  | -8.3  | 5.1  |
| MMV596723  | -15.4 | -10.6 | -3.3  | 0.0   | -7.3  | 6.1  |
| MMV1581378 | -14.6 | -1.6  | -3.3  | 4.9   | -3.7  | 7.0  |
| MMV1581031 | -9.8  | -0.8  | 0.0   | 4.1   | -1.6  | 5.0  |
| MMV1580797 | -24.4 | -19.5 | -17.9 | -5.7  | -16.9 | 6.9  |
| MMV001761  | -16.8 | -11.4 | -13.0 | -0.8  | -10.5 | 5.9  |
| MMV002015  | -17.1 | -2.4  | -5.7  | 6.5   | -4.7  | 8.4  |
| MMV056052  | -13.8 | -13.8 | -7.3  | 0.0   | -8.7  | 5.7  |
| MMV1580504 | -15.4 | -5.7  | -8.1  | 5.7   | -5.9  | 7.6  |
| MMV001961  | -11.4 | -17.9 | -4.1  | -7.3  | -10.2 | 5.2  |
| MMV003738  | 6.5   | -4.9  | -5.7  | -1.6  | -1.4  | 4.8  |
| MMV690540  | -22.8 | -6.5  | -29.3 | -36.6 | -23.8 | 11.1 |
| MMV614278  | -8.1  | -1.6  | -28.5 | -23.6 | -15.4 | 11.0 |
| MMV1580489 | 5.7   | 8.9   | -12.2 | -20.3 | -4.5  | 12.2 |
| MMV1580499 | 7.3   | 8.9   | -15.4 | -13.0 | -3.0  | 11.2 |
| MMV1782115 | 8.1   | 1.6   | -8.9  | -11.4 | -2.6  | 7.9  |
| MMV1782114 | 4.1   | -8.1  | -17.1 | -1.6  | -5.7  | 7.9  |
| MMV018362  | 2.4   | -16.3 | -27.6 | -4.1  | -11.4 | 11.5 |
| MMV1634556 | 2.4   | 22.0  | 6.5   | 8.9   | 10.0  | 7.3  |
| MMV1634401 | 9.8   | 10.6  | 11.4  | 11.4  | 10.8  | 0.7  |
| MMV1634394 | 2.4   | 2.4   | -3.3  | 11.4  | 3.3   | 5.2  |
| MMV1633964 | -5.7  | -2.4  | -3.3  | 3.3   | -2.0  | 3.3  |
| MMV1593516 | -9.8  | -6.5  | -5.7  | -20.3 | -10.6 | 5.8  |
| MMV1593513 | -5.7  | -11.4 | 0.0   | 8.1   | -2.2  | 7.2  |
| MMV1593511 | -0.3  | -0.6  | -0.9  | 7.3   | 1.4   | 3.4  |
| MMV637306  | -2.8  | -3.0  | -3.3  | 0.8   | -2.1  | 1.7  |
| MMV1581377 | -3.3  | 2.4   | -4.1  | 18.7  | 3.5   | 9.2  |
| MMV002780  | -4.1  | -32.5 | -4.9  | 9.8   | -7.9  | 15.3 |
| MMV1580801 | -13.0 | -11.4 | -16.3 | 5.7   | -8.7  | 8.5  |
| MMV010036  | -7.3  | -10.6 | -7.3  | 32.5  | 1.8   | 17.8 |
| MMV637879  | 27.6  | 27.6  | 31.7  | 13.0  | 25.0  | 7.1  |
| MMV617332  | 44.8  | 35.3  | 7.8   | 3.4   | 22.8  | 17.6 |
| MMV1580480 | 3.4   | 6.9   | -9.5  | -16.4 | -3.9  | 9.5  |
| MMV1580494 | -0.9  | -3.4  | -26.7 | -29.3 | -15.1 | 13.0 |
| MMV275100  | 0.9   | -0.9  | -20.7 | -14.7 | -8.8  | 9.1  |
| MMV1782103 | -5.2  | -3.4  | -23.3 | -31.0 | -15.7 | 11.8 |
| MMV1782098 | 0.0   | 6.9   | -19.8 | -21.6 | -8.6  | 12.3 |
| MMV1634397 | -2.6  | -1.7  | -25.0 | -21.6 | -12.7 | 10.6 |
| MMV1633963 | 3.4   | 23.3  | 6.9   | 15.5  | 12.3  | 7.7  |
| MMV1593519 | 8.6   | 14.7  | 2.6   | 15.5  | 10.3  | 5.2  |
| MMV002505  | 9.5   | 7.8   | 8.6   | 6.0   | 8.0   | 1.3  |

|            |       |       |       |       |       |      |
|------------|-------|-------|-------|-------|-------|------|
| MMV1581034 | -6.9  | -2.6  | 1.7   | 4.3   | -0.9  | 4.3  |
| MMV1581033 | -6.9  | 1.7   | 3.4   | 12.9  | 2.8   | 7.0  |
| MMV1557856 | -9.5  | -4.3  | 0.9   | 25.0  | 3.0   | 13.2 |
| MMV1580796 | -1.2  | -2.1  | -4.3  | 0.7   | -1.7  | 1.8  |
| MMV1580505 | -17.2 | -19.0 | -7.8  | 4.3   | -9.9  | 9.3  |
| MMV687798  | -19.8 | -12.1 | -8.6  | 6.0   | -8.6  | 9.4  |
| MMV003297  | -13.8 | -13.8 | 7.8   | 5.2   | -3.7  | 10.2 |
| MMV1580487 | 1.0   | -0.2  | -0.9  | 1.2   | 0.3   | 0.8  |
| MMV1580485 | -7.8  | -2.6  | -7.8  | 6.9   | -2.8  | 6.0  |
| MMV098836  | 56.0  | 59.5  | 21.6  | 55.2  | 48.1  | 15.4 |
| MMV218827  | 9.5   | 5.2   | -12.1 | -15.5 | -3.2  | 10.7 |
| MMV1782111 | 0.9   | -0.9  | -25.0 | -26.7 | -12.9 | 13.0 |
| MMV1782097 | 17.2  | 14.7  | 0.9   | -17.2 | 3.9   | 13.7 |
| MMV1634398 | 12.9  | 11.2  | -3.4  | -1.7  | 4.7   | 7.4  |
| MMV1634396 | -2.6  | 0.9   | -19.0 | -26.7 | -11.9 | 11.4 |
| MMV1634385 | 10.3  | -4.3  | -15.5 | -15.5 | -6.2  | 10.6 |
| MMV1633968 | 12.9  | 8.6   | -0.9  | -3.4  | 4.3   | 6.7  |
| MMV688991  | 6.9   | 10.3  | 1.7   | 2.6   | 5.4   | 3.5  |
| MMV1580502 | 56.0  | 54.3  | 49.1  | 49.3  | 52.2  | 3.0  |
| MMV637855  | 10.3  | 5.2   | 0.0   | -0.9  | 3.7   | 4.5  |
| MMV690467  | -0.9  | -6.0  | -4.3  | -2.6  | -3.4  | 1.9  |
| MMV1580493 | 32.8  | 39.7  | 43.1  | 55.2  | 42.7  | 8.1  |
| MMV1580482 | 2.6   | 1.7   | -1.7  | 3.4   | 1.5   | 2.0  |
| MMV1580501 | -31.0 | -3.4  | -8.6  | -2.6  | -11.4 | 11.6 |
| MMV1580496 | -22.2 | -16.7 | -6.9  | 9.5   | -9.1  | 12.1 |
| MMV1580490 | -32.8 | -14.7 | -5.2  | 10.3  | -10.6 | 15.6 |
| MMV1782113 | -13.8 | -14.7 | -4.3  | 12.1  | -5.2  | 10.7 |
| MMV1634393 | 0.9   | -7.8  | 11.2  | -6.0  | -0.4  | 7.5  |
| MMV1634392 | -8.6  | -4.3  | 0.0   | -0.9  | -3.4  | 3.4  |
| MMV1634389 | 3.4   | 15.5  | 12.1  | 10.3  | 10.3  | 4.4  |
| MMV1581035 | 20.7  | 0.0   | -12.9 | -27.6 | -5.0  | 17.7 |
| MMV1593544 | 25.0  | 3.4   | -12.9 | -25.9 | -2.6  | 19.0 |
| MMV1593521 | 11.2  | 4.3   | -27.6 | -41.4 | -13.4 | 21.8 |
| MMV1593514 | 16.4  | -2.6  | -20.7 | -13.8 | -5.2  | 14.0 |
| MMV1581036 | 0.0   | 2.6   | -18.1 | -19.8 | -8.8  | 10.2 |
| MMV1581030 | 1.7   | 2.6   | -16.4 | -18.1 | -7.5  | 9.7  |
| MMV247764  | -4.3  | -4.3  | -12.9 | -12.9 | -8.6  | 4.3  |
| MMV019724  | 69.8  | 74.1  | 66.4  | 68.1  | 69.6  | 2.9  |
| MMV638198  | 44.0  | 48.3  | 34.5  | 47.4  | 43.5  | 5.5  |
| MMV637413  | -0.9  | -7.8  | -10.3 | -8.6  | -6.9  | 3.6  |
| MMV658803  | -28.4 | -22.4 | -24.1 | -22.4 | -24.4 | 2.5  |
| MMV1580500 | -9.5  | -1.7  | -4.3  | 3.4   | -3.0  | 4.7  |
| MMV1580498 | -19.0 | -29.3 | -34.5 | -24.1 | -26.7 | 5.8  |
| MMV1580488 | 30.2  | 38.8  | 35.3  | 45.7  | 37.5  | 5.6  |
| MMV1580486 | -4.5  | -2.3  | -6.4  | -4.3  | -4.4  | 1.4  |
| MMV1782222 | -0.9  | -4.3  | 6.0   | 12.9  | 3.4   | 6.6  |
| MMV690706  | -22.4 | -12.9 | -8.6  | 0.0   | -11.0 | 8.1  |
| MMV1782220 | -1.7  | -3.4  | 11.2  | 18.1  | 6.0   | 9.0  |



|            |       |       |       |       |       |      |
|------------|-------|-------|-------|-------|-------|------|
| MMV1782213 | 1.7   | -13.8 | -5.2  | 0.0   | -4.3  | 6.0  |
| MMV1782214 | 15.5  | 25.9  | 12.1  | 4.3   | 14.4  | 7.7  |
| MMV1782211 | 49.1  | 39.7  | 25.0  | 17.2  | 32.8  | 12.4 |
| MMV1782210 | -20.7 | -3.4  | -22.4 | -19.0 | -16.4 | 7.6  |
| MMV1782208 | -5.2  | -9.7  | -9.0  | -6.4  | -7.5  | 1.8  |
| MMV1006203 | -12.9 | -2.6  | -7.8  | -12.1 | -8.8  | 4.1  |
| MMV1782353 | -15.5 | -6.9  | -15.5 | -6.9  | -11.2 | 4.3  |
| MMV1782349 | -6.0  | -0.9  | -9.5  | 4.3   | -3.0  | 5.2  |
| MMV1782355 | -19.0 | -6.9  | -17.2 | -7.8  | -12.7 | 5.4  |
| MMV1782352 | -16.4 | -5.2  | -24.1 | -8.6  | -13.6 | 7.3  |
| MMV1782350 | 25.9  | 24.1  | 26.7  | 29.3  | 26.5  | 1.9  |
| MMV1782386 | 2.6   | 0.9   | -14.7 | -6.9  | -4.5  | 6.9  |
| MMV1782412 | 6.9   | -2.6  | -3.4  | -6.9  | -1.5  | 5.1  |
| MMV1613563 | 0.0   | -0.9  | -6.9  | -19.8 | -6.9  | 7.9  |
| MMV1580843 | -17.2 | -12.1 | -25.9 | -16.4 | -17.9 | 5.0  |
| MMV690555  | -30.2 | -36.2 | -12.9 | -23.3 | -25.6 | 8.7  |
| MMV1613559 | -36.2 | -10.3 | -8.6  | -11.2 | -16.6 | 11.4 |
| MMV1634361 | -12.1 | -3.4  | -11.2 | -8.6  | -8.8  | 3.4  |
| MMV002350  | -11.2 | -2.6  | 2.6   | -6.0  | -4.3  | 5.0  |
| MMV1580483 | 2.6   | -5.2  | -3.4  | -15.5 | -5.4  | 6.5  |
| MMV1782209 | 0.0   | -4.3  | -12.9 | -6.0  | -5.8  | 4.7  |
| MMV003069  | -7.8  | -3.4  | -14.7 | -22.4 | -12.1 | 7.2  |
